# Supplementary material for: CO2 capture by Li2CaSiO4 and enhancement with alkali carbonates
Source: Royal Society of Chemistry journal article supplement (doi:10.1039/d3cp02338a), 2023-01-01
Supplement: d3cp02338a1.pdf [file d3cp02338a1.pdf]

## **CO<sub>2</sub> capture by Li<sub>2</sub>CaSiO<sub>4</sub> and enhancement with alkali carbonates**

Zhen Wang<sup>a</sup>, Chenteng Sun<sup>a\*</sup>, Qian Xu<sup>a\*</sup>, Xingli Zou<sup>a</sup>, Hongwei Cheng<sup>a</sup>, Xionggang Lu<sup>a</sup>

<sup>a</sup> *The State Key Laboratory of Advanced Special Steel,*

*Shanghai Key Laboratory of Advanced Ferrometallurgy,*

*School of Materials Science and Engineering, Shanghai University, Shanghai 200072, P. R. China.*

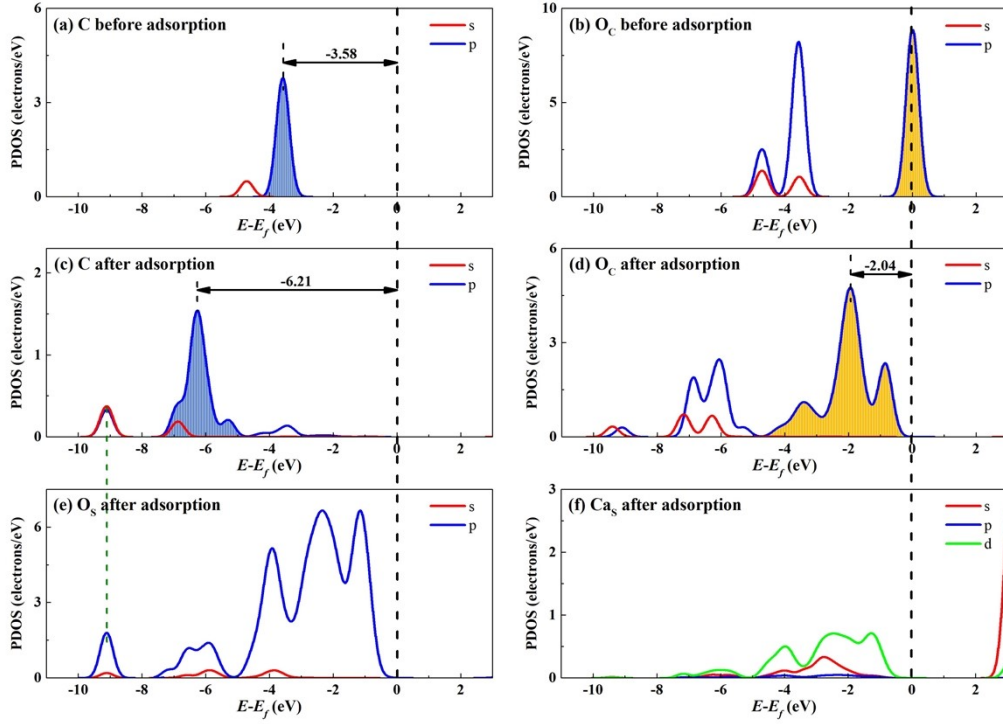

**Fig. S1.** Density of states analyses of CO<sub>2</sub> before and after adsorption on Li<sub>2</sub>CaSiO<sub>4</sub> (101) surface with top atoms of O and Ca.

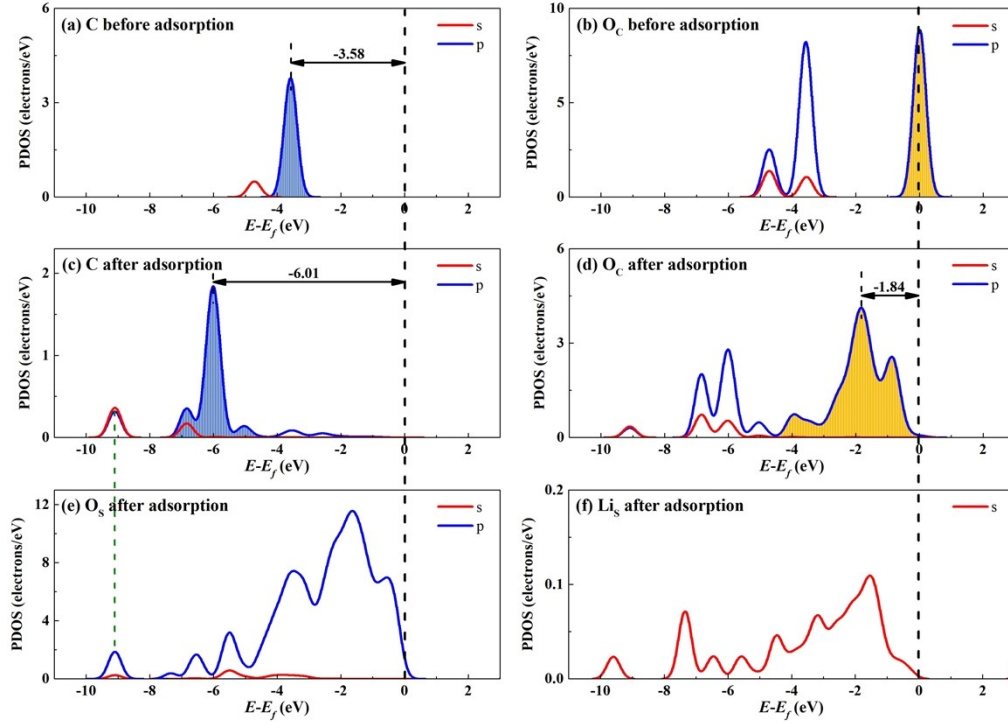

**Fig. S2.** Density of states analyses of CO<sub>2</sub> before and after adsorption on Li<sub>2</sub>CaSiO<sub>4</sub> (101) surface with top atoms of O and Li.

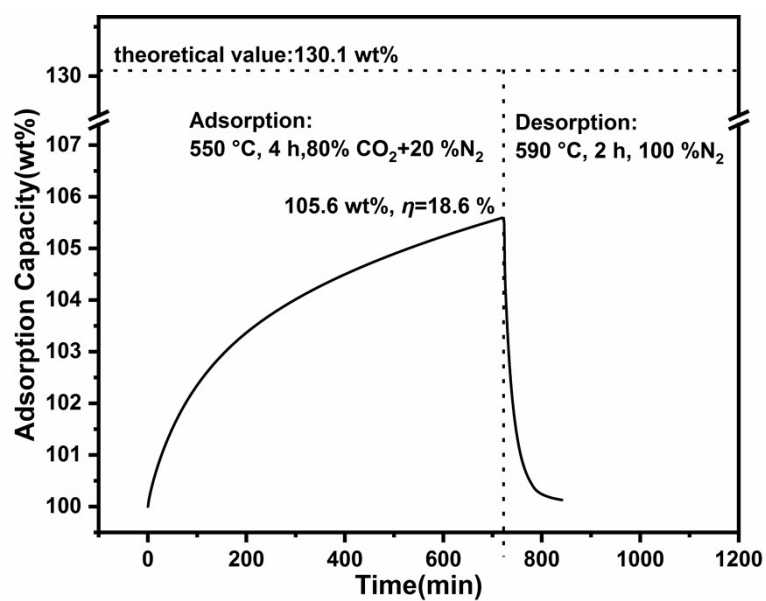

Fig. S3. Isothermal analysis of adsorption at 550 °C in the atmosphere of 80% CO<sub>2</sub> and desorption at 590 °C in 100% N<sub>2</sub>.

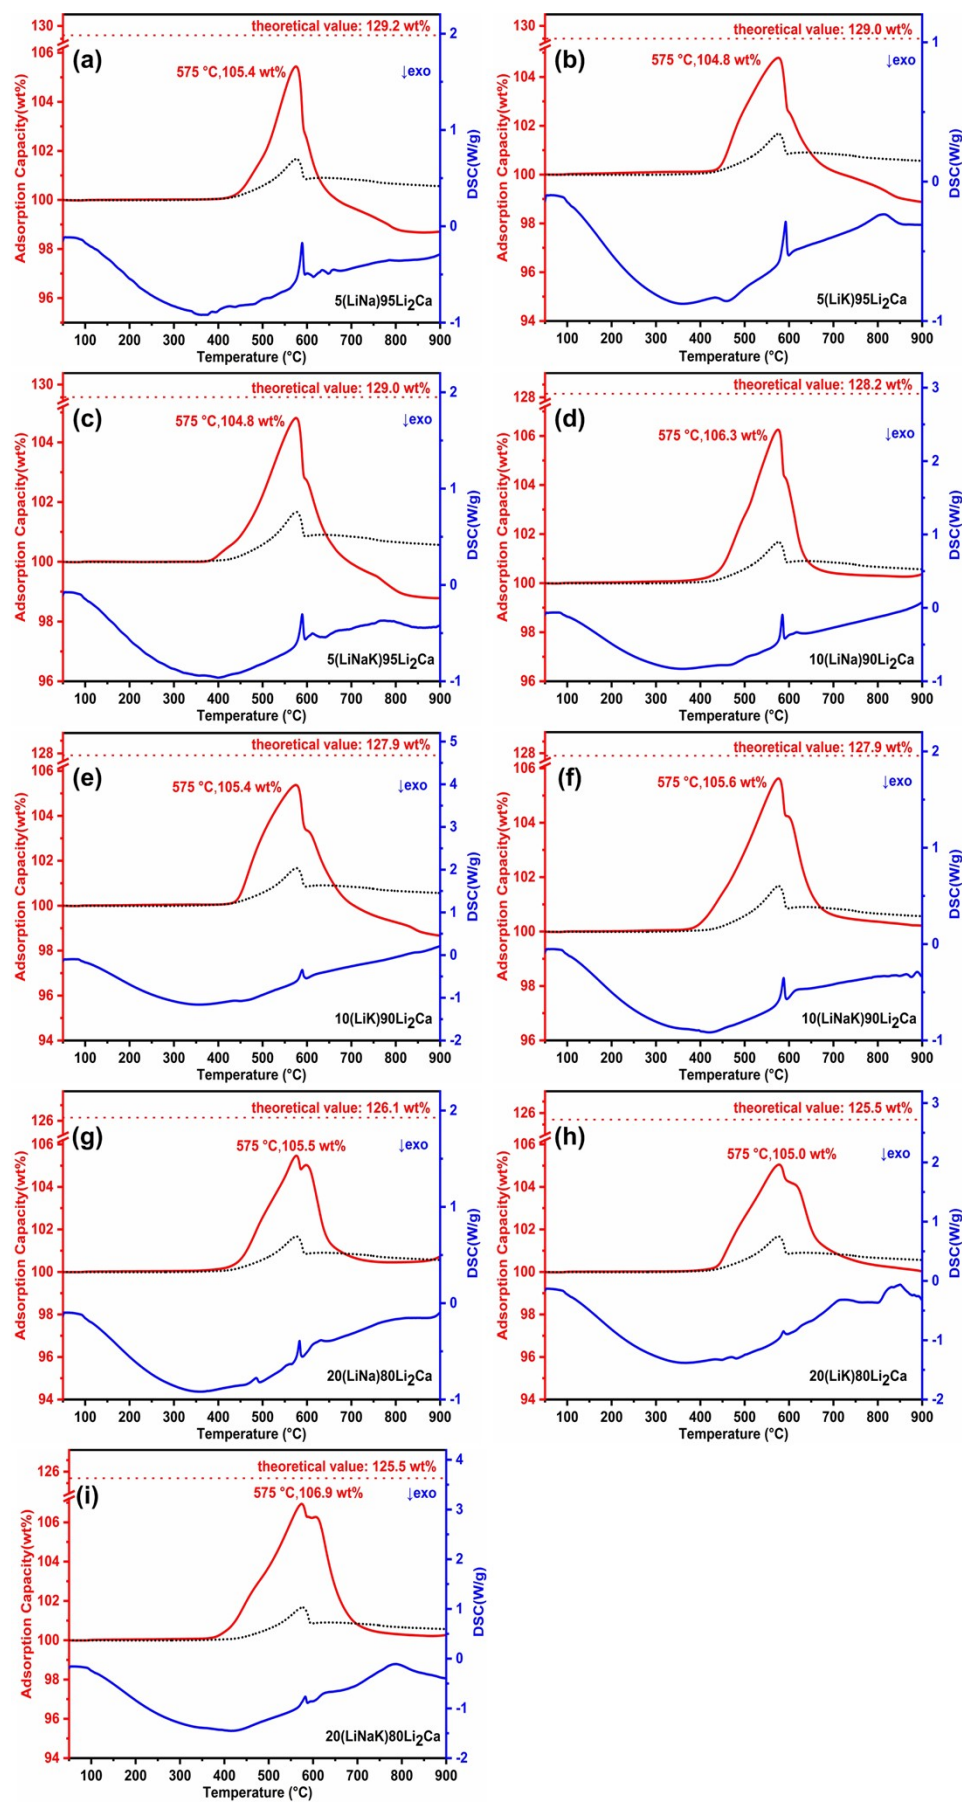

Fig. S4. Dynamic thermal analyses of  $\text{Li}_2\text{CaSiO}_4$  mixed with different alkali carbonates from 50

to 900 °C with a heating rate of 10 °C·min<sup>-1</sup> under the atmosphere containing 80% CO<sub>2</sub>. Dashed line: TG curve of pristine Li<sub>2</sub>CaSiO<sub>4</sub>.

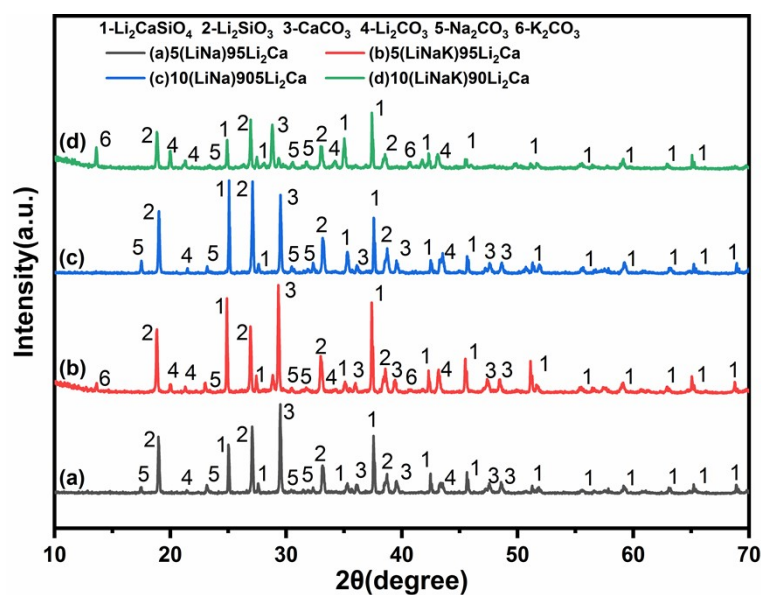

Fig. S5. XRD patterns of the 5(LiNa)95Li<sub>2</sub>Ca(a), 5(LiNaK)95Li<sub>2</sub>Ca(b), 10(LiNa)90Li<sub>2</sub>Ca(c), 10(LiNaK)90Li<sub>2</sub>Ca(d), Li<sub>2</sub>CaSiO<sub>4</sub> after CO<sub>2</sub> adsorption at 550 °C in the 80 % CO<sub>2</sub> for 4 h.

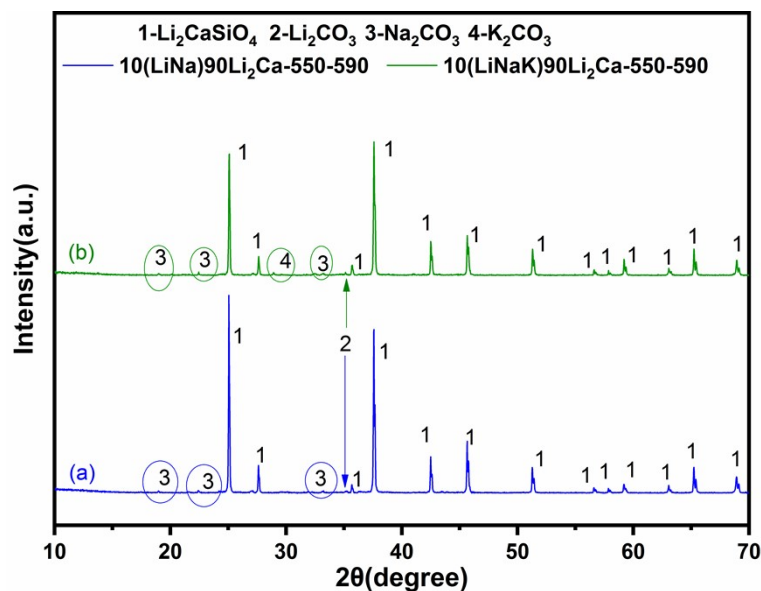

Fig. S6. XRD patterns of the 10(LiNa)90Li<sub>2</sub>Ca(a), 10(LiNaK)90Li<sub>2</sub>Ca(b) after CO<sub>2</sub> desorption at 590 °C in the 100 % N<sub>2</sub> for 2 h.

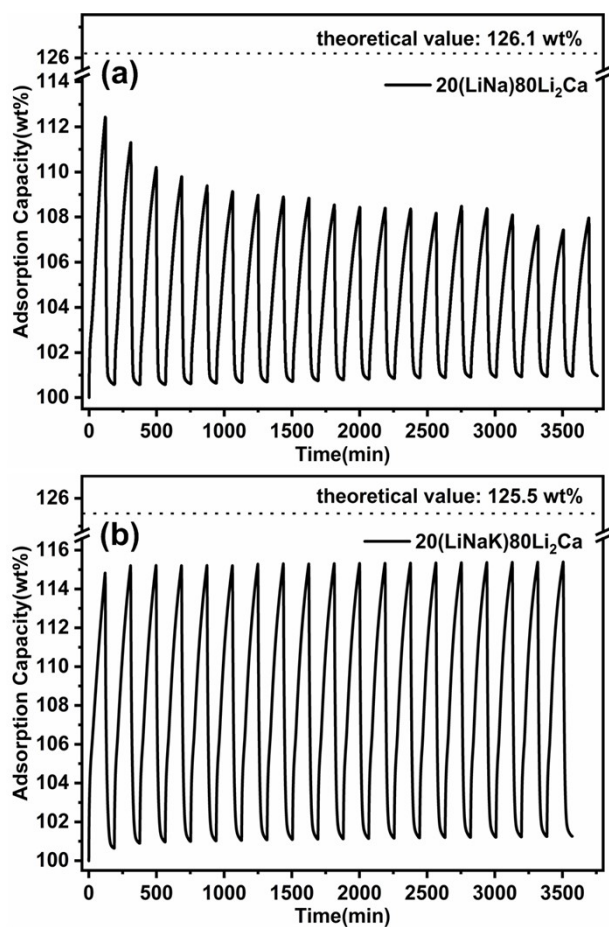

Fig. S7. Cyclic stability of 20(LiNa)80Li<sub>2</sub>Ca(a), and 20(LiNaK)80Li<sub>2</sub>Ca(b) (adsorption: 550°C, 2h, 80% CO<sub>2</sub>, 50 mL·min<sup>-1</sup>; desorption: 590°C, 1h, 100% N<sub>2</sub>, 50 mL·min<sup>-1</sup>)

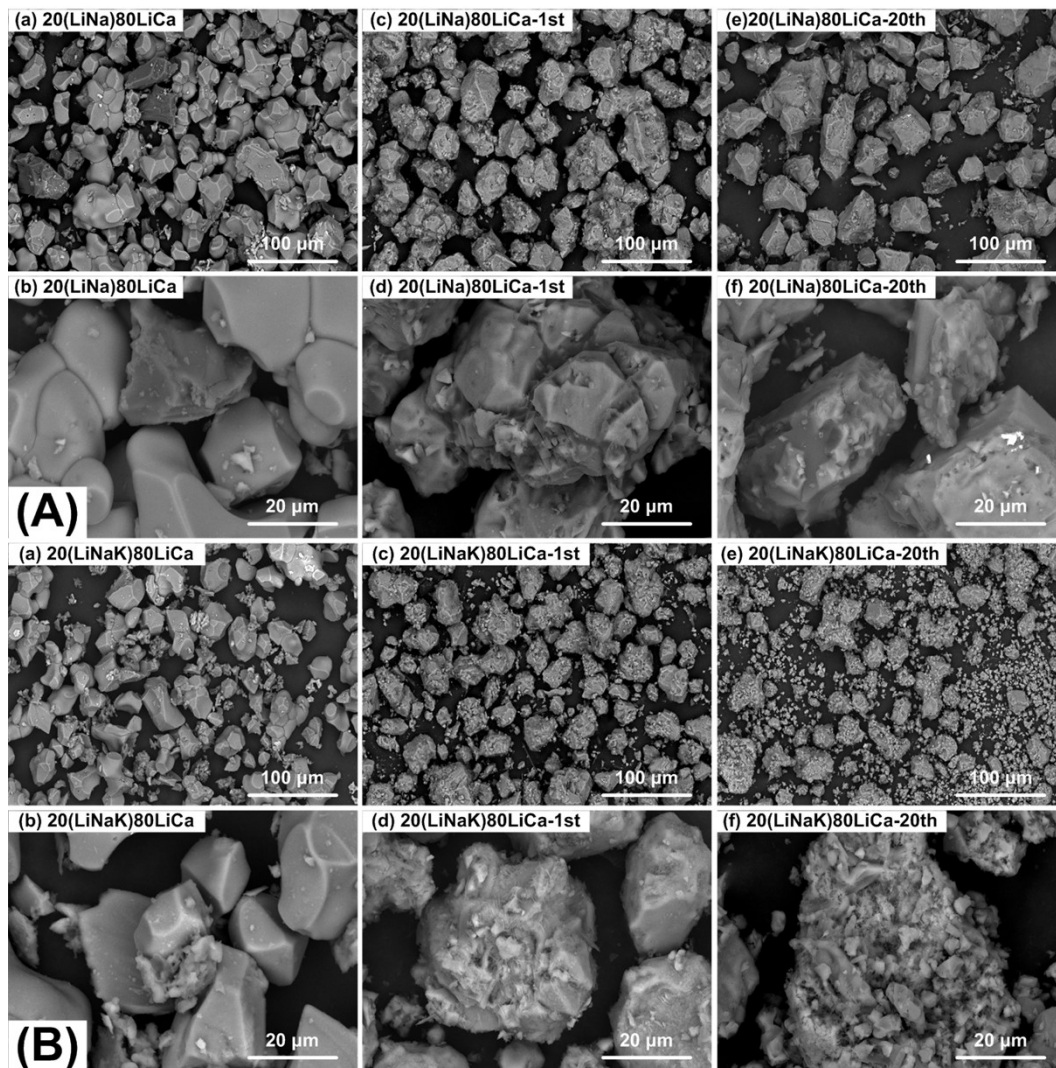

Fig. S8. SEM images of 20(LiNa)80Li<sub>2</sub>Ca (A), and 20(LiNaK)80Li<sub>2</sub>Ca (B) after different cycles

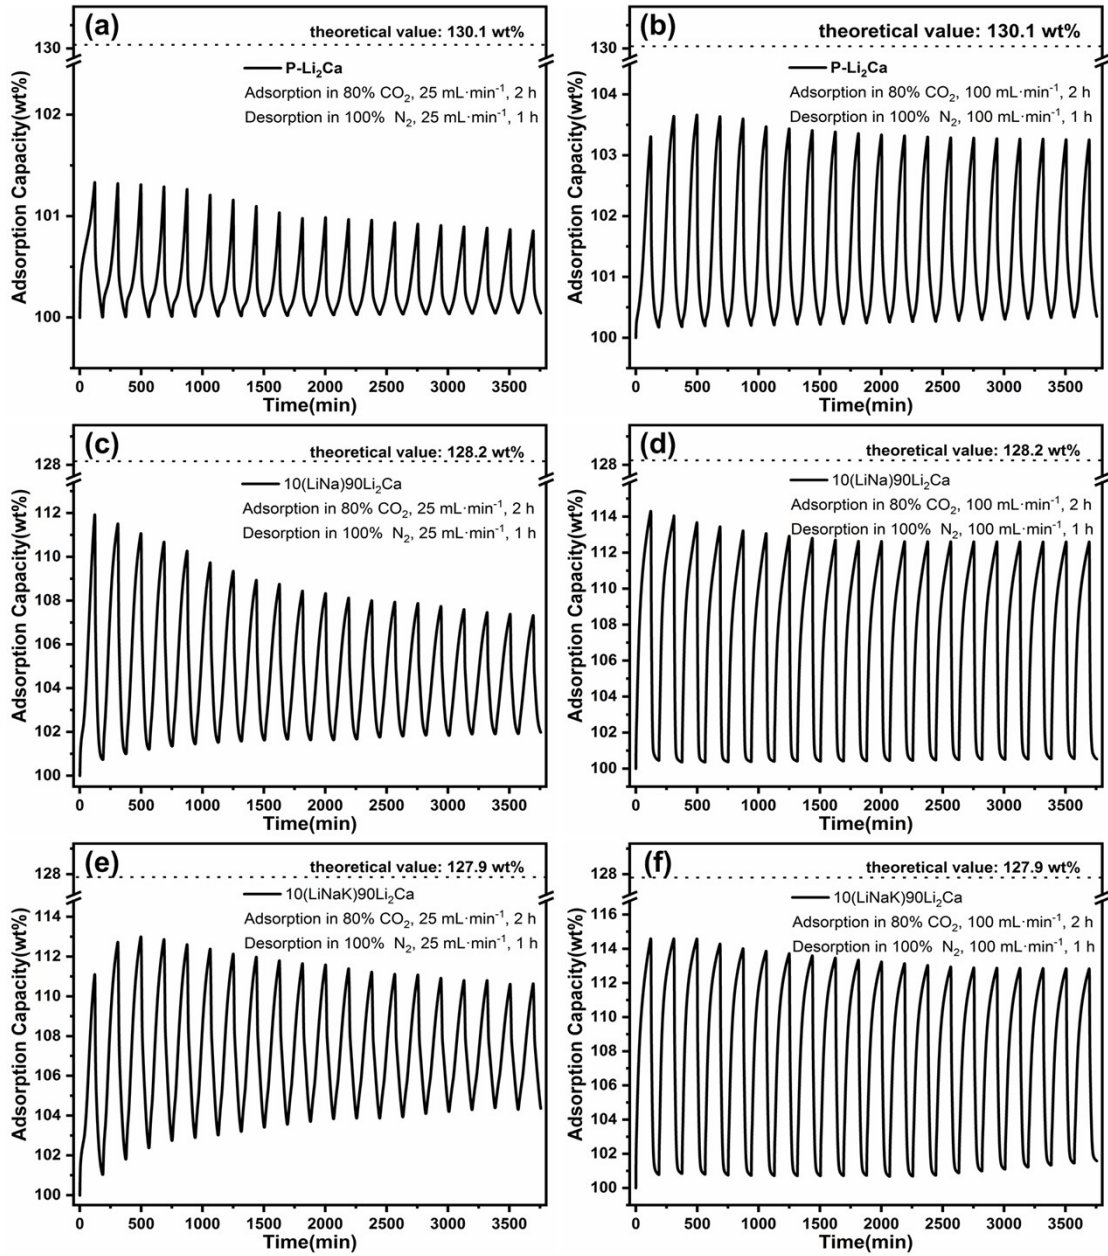

Fig. S9. Cyclic stability of P-Li<sub>2</sub>Ca(a,b), 10(LiNa)90Li<sub>2</sub>Ca(c,d), and 10(LiNaK)90Li<sub>2</sub>Ca(e,f) at different flow rates during 20 capture/release cycles.



**Table S1. Weight gain of P-Li<sub>2</sub>Ca, 10(LiNa)90Li<sub>2</sub>Ca, and 10(LiNaK)90Li<sub>2</sub>Ca at different flow rates during 20 capture/release cycles.**

| Weight gain<br>Flow rate | Samples  | P-Li <sub>2</sub> Ca | 10(LiNa)90Li <sub>2</sub> Ca | 10(LiNaK)90Li <sub>2</sub> Ca |
|--------------------------|----------|----------------------|------------------------------|-------------------------------|
|                          | 25mL/min | Minimum              | 0.8 wt%                      | 5.4 wt%                       |
| Median                   |          | 1.0 wt%              | 7.0 wt%                      | 8.1 wt%                       |
| Maximum                  |          | 1.3 wt%              | 11.9 wt%                     | 11.1 wt%                      |
| 50mL/min                 | Minimum  | 1.2 wt%              | 10.6 wt%                     | 9.6 wt%                       |
|                          | Median   | 1.4 wt%              | 10.8 wt%                     | 10.4 wt%                      |
|                          | Maximum  | 1.6 wt%              | 12.2 wt%                     | 12.3 wt%                      |
| 100mL/min                | Minimum  | 2.9 wt%              | 11.1 wt%                     | 11.4 wt%                      |
|                          | Median   | 3.1 wt%              | 11.3 wt%                     | 12.7 wt%                      |
|                          | Maximum  | 3.3 wt%              | 14.3 wt%                     | 14.6 wt%                      |
